# Supplementary material for: Addressing the Insufficiency of Marine Outfall Regulations in Mitigating Microplastic and AMR Pollution from Wastewater Treatment
Source: Research Square preprint supplement (doi:10.21203/rs.3.rs-3958584/v1), 2024-04-09
Supplement: Supplementary file 1 [file fdc476ea1ec1ec8b68d7e4d0.docx]

# Appendix

**Appendix Table 1:** The different antibiotics used in this study with the growth inhibition zone standards for Enterobacteriaceae.

| **Antibiotics** | **Disk content** | **Interpretive Categories and Zone Diameter Breakpoints, nearest whole mm** | | |
| --- | --- | --- | --- | --- |
|  |  | **S** | **I** | **R** |
| **Class 1: Penicillin** | | | | |
| Ampicillin | 10 µg | ≥ 17 | 14–16 | ≤ 13 |
| **Class 2: B - lactam combination agents** | | | | |
| Amoxicillin- clavulanate | 20 / 10 µg | ≥ 18 | 14 – 17 | ≤ 13 |
| **Class 3: Carbapenems** | | | | |
| Doripenem | 10 µg | ≥ 23 | 20 – 22 | ≤ 19 |
| Ertapenem | 10 µg | ≥ 22 | 19 - 21 | ≤ 18 |
| Imipenem | 10 µg | ≥ 23 | 20 – 22 | ≤ 19 |
| Meropenem | 10 µg | ≥ 23 | 20 – 22 | ≤ 19 |
| **Class 4: Aminoglycosides** | | | | |
| Gentamycin | 10 µg | ≥ 15 | 13 - 14 | ≤ 12 |
| Kanamycin | 30 µg | ≥ 18 | 14 – 17 | ≤ 13 |
| Streptomycin | 10 µg | ≥ 15 | 12 - 14 | ≤ 11 |
| **Class 5: Macrolides** | | | | |
| Azithromycin | 15 µg | ≥ 13 | - | ≤ 12 |
| **Class 6: Tetracycline** | | | | |
| Tetracycline | 30 µg | ≥ 15 | 12 – 14 | ≤ 11 |
| **Class 7: Quinolones and fluoroquinolones** | | | | |
| Ciprofloxacin | 5 µg | ≥ 21 | 16 - 20 | ≤ 15 |
| Nalidixic acid | 30 µg | ≥ 19 | 14 - 18 | ≤ 13 |
| **Class 8: Folate pathway antagonists** | | | | |
| Trimethoprim-sulfamethoxazole | 1.25 / 23.75 µg | ≥ 16 | 11 - 15 | ≤ 10 |
| **Class 9: Phenicols** | | | | |
| Chloramphenicol | 30 µg | ≥ 18 | 13 - 17 | ≤ 12 |
| **Class 10: Fosfomycin** | | | | |
| Fosfomycin | 200 µg | ≥ 16 | 13 - 15 | ≤ 12 |

**Appendix Table 2:** Accession numbers obtained from GenBank

| **Accession** | **Sequence ID** |
| --- | --- |
| OR178026 | Citrobacter_sp._R351E |
| OR178027 | Citrobacter_sp._R441E |
| OR178028 | Citrobacter_sp._R521E |
| OR178029 | Citrobacter_sp._R561E |
| OR178030 | Enterobacter_sp._R211E |
| OR178031 | Enterobacter_sp._R241E |
| OR178032 | Enterobacter_sp._R313E |
| OR178033 | Enterobacter_sp._R471E |
| OR178034 | Enterobacter_sp._R61i |
| OR178035 | Klebsiella_sp._R761E |
| OR178036 | Escherichia_sp._R641E |
| OR178037 | Escherichia_sp._R652E |
| OR178038 | Escherichia_sp._R732E |
| OR178039 | Klebsiella_sp._R12i |
| OR178040 | Klebsiella_sp._R212E |
| OR178041 | Klebsiella_sp._R251E |
| OR178042 | Klebsiella_sp._R25i |
| OR178043 | Klebsiella_sp._R341E |
| OR178044 | Klebsiella_sp._R342E |
| OR178045 | Klebsiella_sp._R45i |
| OR178046 | Klebsiella_sp._R63i |
| OR178047 | Klebsiella_sp._R762E |
| OR178048 | Pseudomonas_sp._R213E |
| OR178049 | Pseudomonas_sp._R253E |
| OR178050 | Pseudomonas_sp._R273E |
| OR178051 | Pseudomonas_sp._R423E |
| OR178052 | Pseudomonas_sp._R433E |
| OR178053 | Pseudomonas_sp._R463E |
| OR178054 | Pseudomonas_sp._R731E |
| OR178055 | Vibrio_sp._R512E |
